# Supplementary material
Source: Research Square preprint supplement (doi:10.21203/rs.3.rs-8080642/v1)

# **SUPPLEMENTARY MATERIAL**

**TWO STEPS AWAY FROM EXTINCTION: DO YOU BELIEVE?**

KARINA APARECIDA SOARES DE PÁDUA, THAIS MARTINS TEIXEIRA, ALISON GONÇALVES NAZARENO

Department of Genetics, Ecology, and Evolution - Federal University of Minas Gerais, Avenida Presidente Antônio Carlos 6627, Pampulha, Belo Horizonte, MG, 31270-901, Brazil

TABLE S1 Number of samples per ontogenetic stage for *Dinizia jueirana-facao* G. P. Lewis & G. S. Siqueira based on diameter at breast height (DBH) for each sampled location before (BF) and after (AF) data quality filtering (i.e., removal of samples that did not meet the criteria for number of raw reads obtained from high-throughput sequencing).

|  | **Seedlings**  **(DBH < 5 cm)** | | **Intermediate**  **(5 cm > DBH > 14 cm)** | | **Reproductive adults (DBH ≥ 14 cm)** | | **Reproductive adults**  **(DBH > 54 cm)¹** | | **Total samples** | |
| --- | --- | --- | --- | --- | --- | --- | --- | --- | --- | --- |
| **Locality** | **BF** | **AF** | **BF** | **AF** | **BF** | **AF** | **BF** | **AF** | **BF** | **AF** |
| RNV | 21 | 21 | 34 | 34 | 61 | 59 | 12 | 12 | 116 | 114 |
| RBS | 37 | 29 | 26 | 15 | 32 | 26 | 16 | 13 | 95 | 70 |

**¹** Individuals with an estimated age over 120 years.

TABLE S2 Summary of ontogenetic stages included in each dataset used to investigate genetic and ecological patterns in *Dinizia jueirana-facao*. Stage selection was based on the focus, assumptions, and hypotheses addressed by each analysis. Seedlings: DBH < 5 cm; Intermediates: 5 cm > DBH > 14 cm; Reproductive adults: DBH ≥ 14 cm; Reproductive adults (DBH > 54 cm)¹.

| **Dataset** | **Analysis Type** | **Ontogenetic Stages Used** | **Methodological Approach** |
| --- | --- | --- | --- |
| (a) | Paternity, SGS, Mating system | Seedlings and Reproductive Adults | Assumes non-overlapping generations and tests the hypothesis of recent reduction in gene flow; Explores the mating system. |
| (b) | Genetic Diversity, Inbreeding | Seedlings and Reproductive Adults¹ | Assumes non-overlapping generations and tests hypotheses of genetic diversity loss and increase in inbreeding due to fragmentation. |
| (c) | Effective Population Size (*Ne*), population demographic structure | Seedlings, Intermediates, and Reproductive Adults | Tests hypotheses of reduced *Ne* and demographic shifts due to fragmentation. |

¹Reproductive adults (DBH > 54 cm) are individuals estimated to be over 120 years old and represent the pre-fragmentation cohort.

**TABLE S**3 Results of Shapiro-Wilk Normality and Kolmogorov-Smirnov tests applied to the variables DBH (Diameter at Breast Height) and Height for each ontogenetic stage of *Dinizia jueirana-facao* G. P. Lewis & G. S. Siqueira in two Atlantic forest fragments – Reserva Natural da Vale (RNV) and Reserva Biológica de Sooretama (RBS) – located in Espírito Santo State, Southeast Brazil. *p*-value > 0.05 are in bold.

|  |  | Shapiro-Wilk Normality Test | | | |
| --- | --- | --- | --- | --- | --- |
|  |  | DBH | | Height | |
|  |  | W | *p-value* | W | *p-value* |
| RNV | seedlings | 0.62775 | 3.924e-06 | 0.6934 | 2.281e-05 |
| intermediates | 0.95175 | 0.1385 | 0.96231 | 0.2836 |
| adults | 0.75325 | 9.013e-09 | 0.94848 | 0.01221 |
| RBS | seedlings | 0.78015 | 5.324e-06 | 0.79315 | 9.518e-06 |
| intermediates | 0.95157 | 0.2524 | 0.89615 | 0.01286 |
| adults | 0.87798 | 0.001784 | 0.92285 | 0.02811 |
|  |  | Kolmogorov-Smirnov Test | | | |
|  |  | KS test | *p-value* | KS test | *p-value* |
| Seedlings | RNV vs RBS | 0.24067 | **0.1965** | 0.30116 | **0.102** |
| Intermediates | RNV vs RBS | 0.23303 | **0.2773** | 0.16968 | **0.4611** |
| Adults | RNV vs RBS | 0.30943 | 0.02446 | 0.27393 | 0.0427 |

**TABLE S**4 Regeneration status of *Dinizia jueirana-facao* G. P. Lewis & G. S. Siqueira in two Atlantic forest fragments – Reserva Natural da Vale (RNV) and Reserva Biológica de Sooretama (RBS) – located in Espírito Santo State, Southeast Brazil.

|  | **Area (ha)** | **Seedlings** | **Intermediates** | **Adults** | **Regeneration status** |
| --- | --- | --- | --- | --- | --- |
| RNV | 42.99 | 0.49 | 0.79 | 1.42 | Fair |
| RBS | 64.81 | 0.57 | 0.40 | 0.49 | Good |

**TABLE S**5The effect of missing data (MD) variation on genetic parameters (*H*O - observed heterozygosity, *H*E - expected heterozygosity, *F*IS - inbreeding coefficient) for each ontogenetic stage of *Dinizia jueirana-facao* G. P. Lewis & G. S. Siqueira in two Atlantic forest fragments – Reserva Natural da Vale (RNV) and Reserva Biológica de Sooretama (RBS) – located in Espírito Santo State, Southeast Brazil.

| **Seedlings** – **RNV** | | | | | | | |
| --- | --- | --- | --- | --- | --- | --- | --- |
| **%MD** | **SNPs** | ***H*O** | **95% CI** | ***H*E** | **95% CI** | ***F*IS** | **95% CI** |
| 0% | 450 | 0.180 | 0.102 - 0.258 | 0.186 | 0.11 - 0.262 | 0.020 | -0.076 - 0.116 |
| 5% | 2,674 | 0.203 | 0.124 - 0.282 | 0.214 | 0.136 - 0.292 | 0.041 | -0.06 - 0.142 |
| 10% | 4,057 | 0.194 | 0.113 - 0.275 | 0.208 | 0.127 - 0.289 | 0.053 | -0.06 - 0.166 |
| 15% | 5,195 | 0.186 | 0.105 - 0.267 | 0.202 | 0.121 - 0.283 | 0.064 | -0.057 - 0.185 |
| 20% | 6,268 | 0.180 | 0.097 - 0.263 | 0.198 | 0.115 - 0.281 | 0.073 | -0.058 - 0.204 |
| 25% | 7,206 | 0.177 | 0.094 - 0.26 | 0.196 | 0.113 - 0.279 | 0.078 | -0.058 - 0.214 |
| 30% | 8,408 | 0.173 | 0.088 - 0.258 | 0.194 | 0.109 - 0.279 | 0.083 | -0.062 - 0.228 |
| **Reproductive adults** – **RNV** | | | | | | | |
| **%MD** | **SNPs** | ***H*O** | **95% CI** | ***H*E** | **95% CI** | ***F*IS** | **95% CI** |
| 0% | 517 | 0.199 | 0.153 - 0.245 | 0.191 | 0.148 - 0.234 | -0.031 | -0.065 - 0.003 |
| 5% | 2,985 | 0.230 | 0.182 - 0.278 | 0.225 | 0.18 - 0.27 | -0.011 | -0.052 - 0.03 |
| 10% | 4,579 | 0.220 | 0.173 - 0.267 | 0.221 | 0.176 - 0.266 | 0.007 | -0.039 - 0.053 |
| 15% | 5,917 | 0.211 | 0.164 - 0.258 | 0.216 | 0.17 - 0.262 | 0.021 | -0.031 - 0.073 |
| 20% | 7,243 | 0.205 | 0.157 - 0.253 | 0.212 | 0.166 - 0.258 | 0.036 | -0.022 - 0.094 |
| 25% | 8,365 | 0.201 | 0.153 - 0.249 | 0.211 | 0.164 - 0.258 | 0.043 | -0.018 - 0.104 |
| 30% | 9,869 | 0.197 | 0.148 - 0.246 | 0.209 | 0.161 - 0.257 | 0.053 | -0.012 - 0.118 |

| **Seedlings** – **RBS** | | | | | | | |
| --- | --- | --- | --- | --- | --- | --- | --- |
| **%MD** | **SNPs** | ***H*O** | **95% CI** | ***H*E** | **95% CI** | ***F*IS** | **95% CI** |
| 0% | 517 | 0.204 | 0.139 - 0.269 | 0.200 | 0.14 - 0.26 | -0.015 | -0.08 - 0.05 |
| 5% | 2,917 | 0.224 | 0.156 - 0.292 | 0.225 | 0.161 - 0.289 | 0.008 | -0.069 - 0.085 |
| 10% | 4,433 | 0.215 | 0.146 - 0.284 | 0.221 | 0.155 - 0.287 | 0.023 | -0.063 - 0.109 |
| 15% | 5,761 | 0.209 | 0.138 - 0.28 | 0.216 | 0.149 - 0.283 | 0.034 | -0.06 - 0.128 |
| 20% | 7,032 | 0.201 | 0.131 - 0.271 | 0.212 | 0.145 - 0.279 | 0.045 | -0.054 - 0.144 |
| 25% | 8,100 | 0.197 | 0.126 - 0.268 | 0.210 | 0.141 - 0.279 | 0.052 | -0.053 - 0.157 |
| 30% | 9,481 | 0.193 | 0.121 - 0.265 | 0.208 | 0.138 - 0.278 | 0.059 | -0.052 - 0.17 |
| **Reproductive adults** – **RBS** | | | | | | | |
| **%MD** | **SNPs** | ***H*O** | **95% CI** | ***H*E** | **95% CI** | ***F*IS** | **95% CI** |
| 0% | 506 | 0.218 | 0.143 - 0.293 | 0.201 | 0.136 - 0.266 | -0.065 | -0.126 - -0.004 |
| 5% | 2,847 | 0.238 | 0.16 - 0.316 | 0.224 | 0.155 - 0.293 | -0.046 | -0.12 - 0.028 |
| 10% | 4,299 | 0.228 | 0.149 - 0.307 | 0.219 | 0.148 - 0.29 | -0.029 | -0.114 - 0.056 |
| 15% | 5,543 | 0.220 | 0.141 - 0.299 | 0.214 | 0.143 - 0.285 | -0.016 | -0.108 - 0.076 |
| 20% | 6,747 | 0.211 | 0.131 - 0.291 | 0.209 | 0.136 - 0.282 | -0.004 | -0.104 - 0.096 |
| 25% | 7,781 | 0.207 | 0.127 - 0.287 | 0.207 | 0.134 - 0.28 | 0.005 | -0.1 - 0.11 |
| 30% | 9,119 | 0.203 | 0.122 - 0.284 | 0.205 | 0.131 - 0.279 | 0.013 | -0.1 - 0.126 |

**TABLE S**6 The effect of minor allele frequency (MAF) variation on the number of single nucleotide polymorphisms (SNPs) for *Dinizia jueirana-facao* G. P. Lewis & G. S. Siqueira. The percentage of missing data was set at 10%.

| **MAF** | 0.05 | 0.10 | 0.15 | 0.20 | 0.25 | 0.30 | 0.35 | 0.40 | 0.45 | 0.50 |
| --- | --- | --- | --- | --- | --- | --- | --- | --- | --- | --- |
| **SNPs** | 4,194 | 3,421 | 2,834 | 2,289 | 1,856 | 1,406 | 1,030 | 702 | 330 | 11 |

**TABLE S**7 Mean values of allelic richness (*A*), private allelic richness (*R*), and inbreeding coefficients () presented for each ontogenetic stage of *Dinizia jueirana-facao* G. P. Lewis & G. S. Siqueira in two Atlantic forest fragments – Reserva Natural da Vale (RNV) and Reserva Biológica de Sooretama (RBS) – located in the Espírito Santo State, Southeast Brazil. 95% confidence intervals for each genetic parameter are also shown.

|  | **Site** | ***A*** | **95% CI** | ***R*** | **95% CI** | ***F*IS** | **95% CI** |
| --- | --- | --- | --- | --- | --- | --- | --- |
| Adults | RNV | 1.711 | 1.705 - 1.717 | 0.197 | 0.192 - 0.202 | -0.051 | -0.21 - 0.108 |
| RBS | 1.690 | 1.684 - 1.696 | 0.176 | 0.172 - 0.181 | -0.049 | -0.186 - 0.088 |
| Seedlings | RNV | 1.661 | 1.655 - 1.667 | 0.164 | 0.160 - 0.168 | 0.044 | -0.061 - 0.149 |
| RBS | 1.694 | 1.689 - 1.700 | 0.197 | 0.193 - 0.201 | 0.006 | -0.068 - 0.08 |

**TABLE S**8 Paternity analysis for *Dinizia jueirana-facao* G. P. Lewis & G. S. Siqueira in two Atlantic forest fragments – Reserva Natural da Vale (RNV) and Reserva Biológica de Sooretama (RBS) – located in Espírito Santo State, Southeast Brazil. Only parent pairs inferred with a probability higher than 95% were considered. # represents the candidate parents that were not identified in the sample. Selfing events are shown in bold.

| **RNV** | | | |
| --- | --- | --- | --- |
| **ID - Seedlings** | **ID - Inferred Father** | **ID - Inferred Mother** | **Probability** |
| pop1_102 | pop1_86 | pop1_100 | 1.0000 |
| pop1_113 | pop1_114 | pop1_111 | 1.0000 |
| pop1_12 | pop1_1 | pop1_8 | 1.0000 |
| pop1_17 | #1 | #9 | 1.0000 |
| pop1_18 | #2 | #9 | 1.0000 |
| pop1_25 | pop1_1 | pop1_26 | 1.0000 |
| pop1_27 | #3 | pop1_26 | 1.0000 |
| **pop1_28** | **pop1_26** | **pop1_26** | **1.0000** |
| pop1_32 | pop1_26 | pop1_37 | 1.0000 |
| **pop1_34** | **pop1_37** | **pop1_37** | **1.0000** |
| **pop1_35** | **pop1_37** | **pop1_37** | **1.0000** |
| **pop1_36** | **pop1_37** | **pop1_37** | **1.0000** |
| **pop1_38** | **pop1_37** | **pop1_37** | **1.0000** |
| **pop1_39** | **pop1_1** | **pop1_1** | **1.0000** |
| pop1_54 | #4 | pop1_51 | 1.0000 |
| pop1_55 | #5 | #9 | 1.0000 |
| pop1_59 | #5 | pop1_60 | 1.0000 |
| pop1_7 | #6 | #10 | 1.0000 |
| pop1_72 | #7 | #11 | 1.0000 |
| pop1_85 | #8 | pop1_78 | 1.0000 |
| pop1_87 | pop1_78 | pop1_86 | 1.0000 |

| RBS | | | |
| --- | --- | --- | --- |
| **ID - Seedlings** | **Inferred Father** | **Inferred Mother** | **Probability** |
| pop2_209 | #1 | pop2_217 | 1.0000 |
| pop2_210 | pop2_231 | pop2_217 | 1.0000 |
| pop2_212 | #2 | pop2_217 | 1.0000 |
| pop2_213 | #3 | pop2_217 | 1.0000 |
| pop2_218 | pop2_231 | pop2_217 | 1.0000 |
| pop2_223 | pop2_220 | #17 | 0.6224 |
| pop2_223 | #17 | pop2_220 | 0.3776 |
| pop2_226 | #4 | pop2_247 | 0.9059 |
| pop2_226 | pop2_247 | #4 | 0.0941 |
| pop2_230 | pop2_217 | pop2_231 | 0.9093 |
| pop2_230 | pop2_231 | pop2_217 | 0.0907 |
| pop2_237 | #5 | pop2_232 | 1.0000 |
| pop2_245 | #6 | pop2_250 | 1.0000 |
| pop2_254 | pop2_264 | pop2_257 | 0.9966 |
| pop2_260 | pop2_264 | pop2_259 | 1.0000 |
| pop2_261 | pop2_217 | pop2_257 | 0.7131 |
| pop2_261 | pop2_257 | pop2_217 | 0.2869 |
| **pop2_263** | **#7** | **#7** | **1.0000** |
| pop2_265 | #8 | pop2_264 | 1.0000 |
| pop2_266 | #9 | pop2_264 | 1.0000 |
| pop2_268 | #10 | #18 | 1.0000 |
| pop2_272 | #10 | pop2_264 | 1.0000 |
| pop2_273 | #11 | pop2_264 | 1.0000 |
| pop2_274 | pop2_257 | pop2_275 | 1.0000 |
| pop2_277 | #7 | pop2_275 | 1.0000 |
| **pop2_279** | **#7** | **#7** | **1.0000** |
| pop2_280 | pop2_287 | #7 | 0.9059 |
| pop2_280 | #7 | pop2_287 | 0.0941 |
| pop2_285 | #12 | pop2_291 | 1.0000 |
| pop2_286 | #13 | #12 | 1.0000 |
| pop2_288 | #5 | pop2_287 | 1.0000 |
| pop2_289 | #14 | #12 | 1.0000 |
| pop2_290 | #15 | pop2_291 | 1.0000 |
| pop2_294 | #16 | #19 | 1.0000 |

**FIGURE S1** Map showing the occurrence area (A-B) of *Dinizia jueirana-facao* G. P. Lewis & G. S. Siqueira in two Atlantic forest fragments – Reserva Natural da Vale (red point in C) and Reserva Biológica de Sooretama (yellow point in C) – located in Espírito Santo State, Southeast Brazil. The distance between the areas is approximately 12 kilometers.


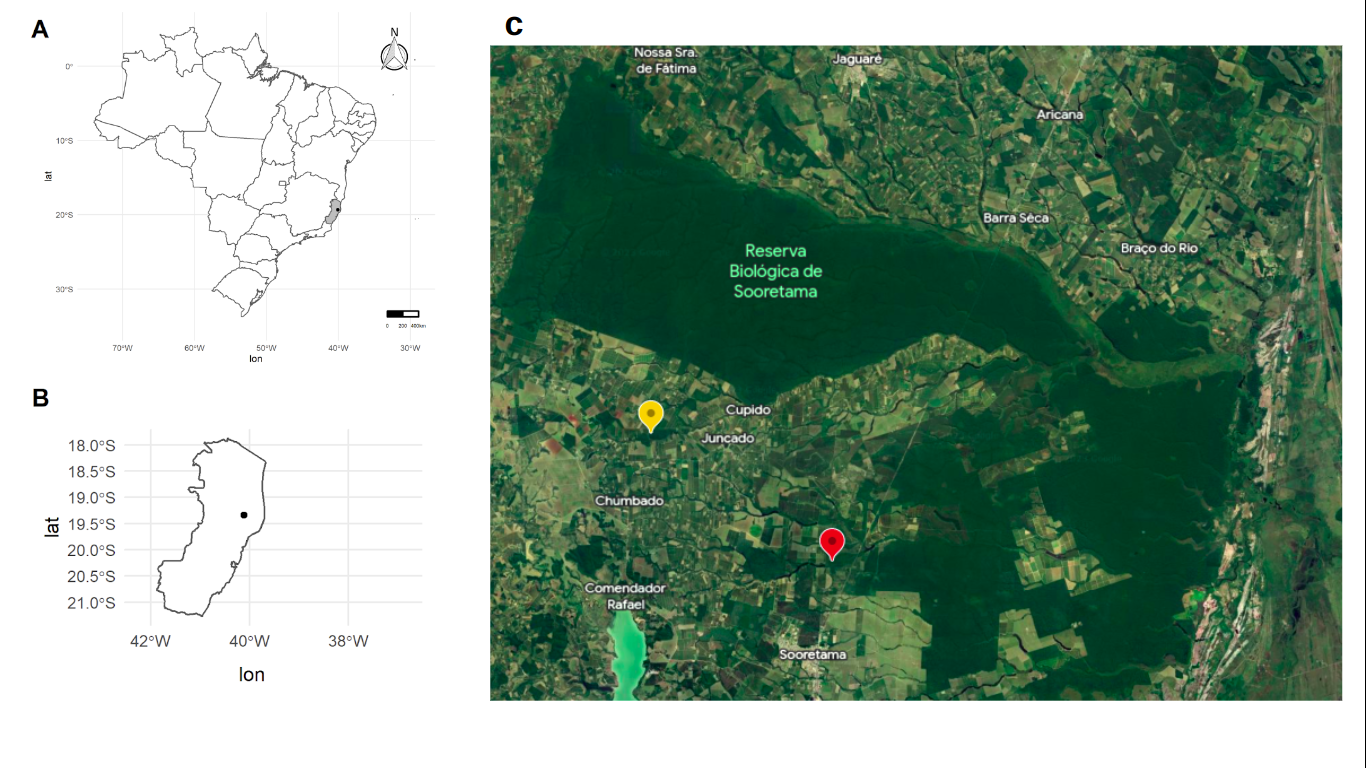


**FIGURE S2** Box plot quality of reads. Center lines show the medians; box limits indicate the 25th and 75th percentiles as determined by R software; whiskers extend to 5th and 95th percentiles. (A) Number of retained reads with all samples, outliers are represented by dots. n = 211 sample points. (B) Number of retained reads by locality, outliers are represented by dots. n = 116 and 95 sample points. Samples with less than 500,000 reads were discarded from the dataset.


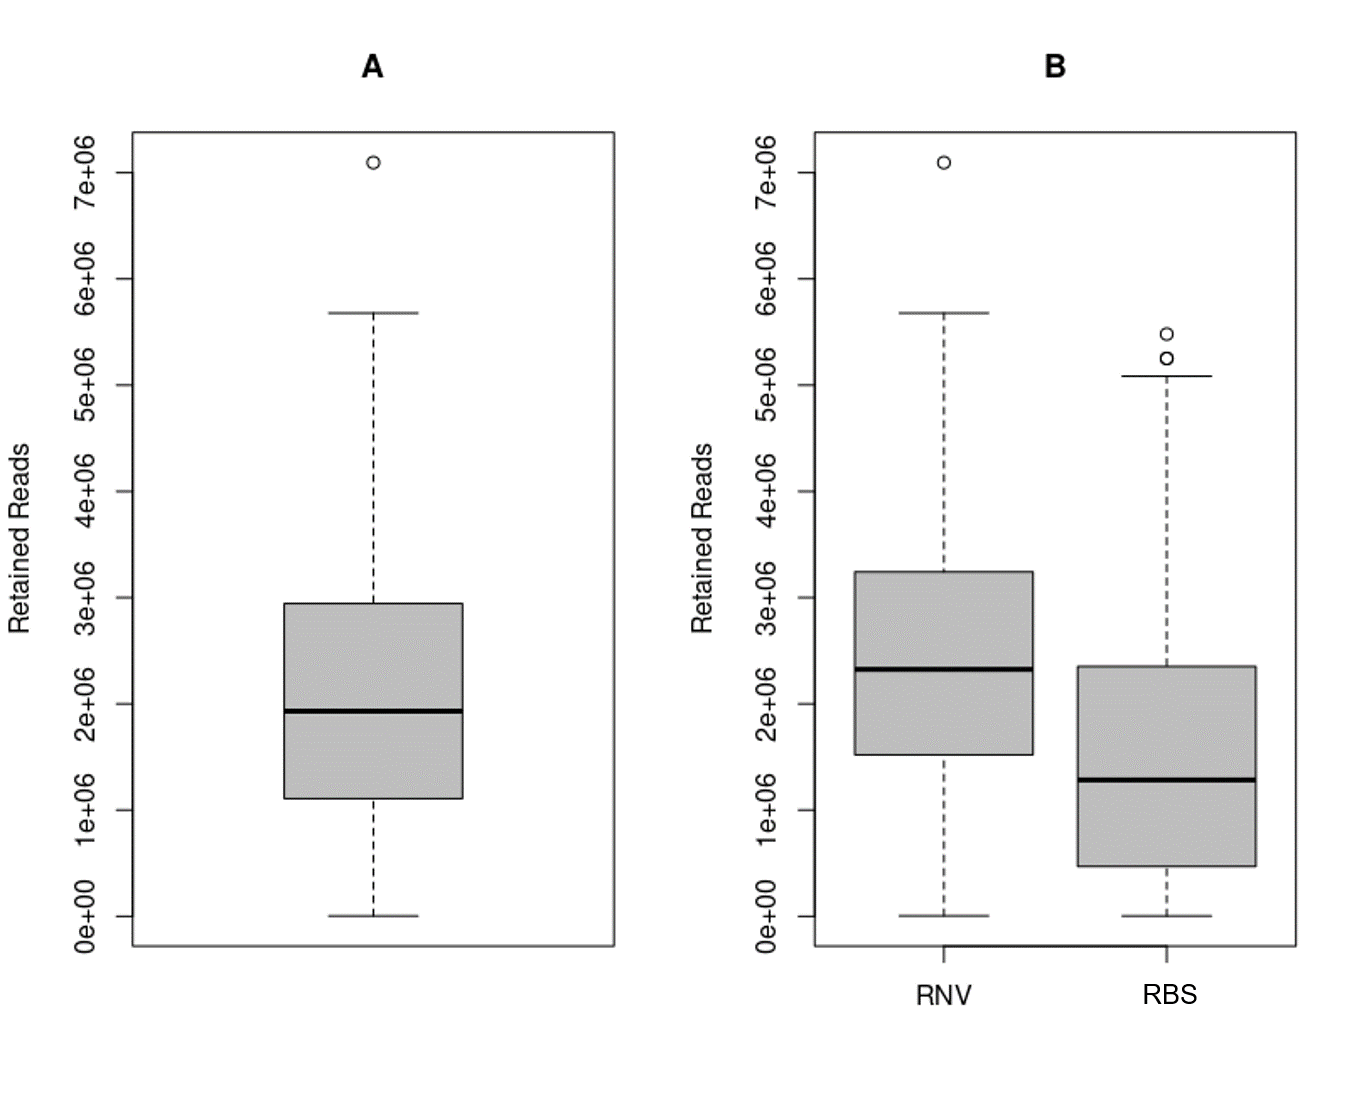


**FIGURE S3** Box plots illustrating the distribution of Diameter at Breast Height (DBH) and Height for each ontogenetic stage of *Dinizia jueirana-facao* G. P. Lewis & G. S. Siqueira individuals in two Atlantic forest fragments: Reserva Natural da Vale (RNV) and Reserva Biológica de Sooretama (RBS). Center lines show the medians; box limits indicate the 25th and 75th percentiles as determined by R software; whiskers extend to 5th and 95th percentiles.


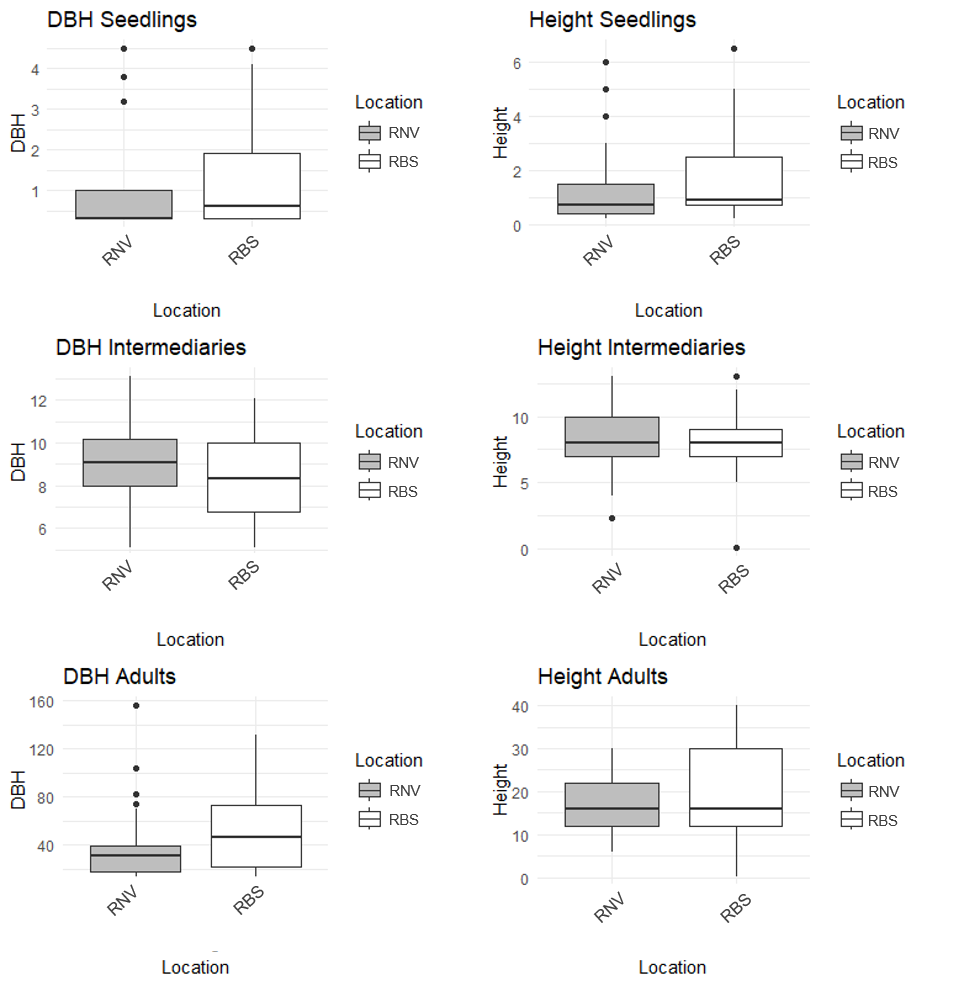

Supplement: Supplementary file 1 [file f8064cb38abda572648a3598.docx]
